# Supplementary material for: Designed synthesis of a unique single-crystal Fe-doped LiNiPO4 nanomesh as an enhanced cathode for lithium ion batteries
Source: Royal Society of Chemistry journal article supplement (doi:10.1039/c5ta03952e), 2015-01-01
Supplement: c5ta03952e1.pdf [file c5ta03952e1.pdf]

Supporting Information:

## Designed Synthesis of Unique Single-crystal Fe-doped $\text{LiNiPO}_4$

### Nanomesh as the Enhanced Cathode for Lithium Ion Batteries

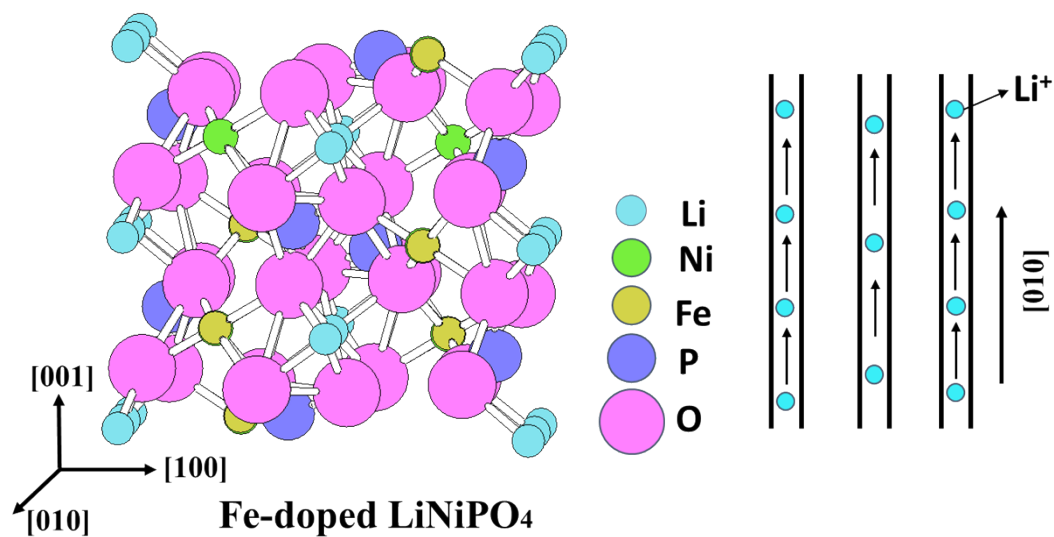

**Figure S1.** Schematic illustration of Fe-doped  $\text{LiNiPO}_4$  and Li ion diffusion pathway along  $[010]$ .

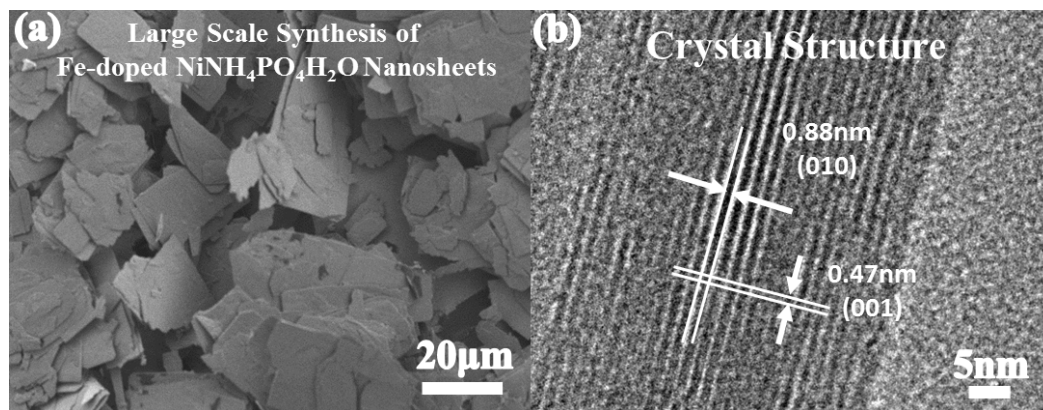

**Figure S2.** (a) SEM image and (b) HRTEM image of Fe-doped  $\text{NiNH}_4\text{PO}_4\cdot\text{H}_2\text{O}$  nanosheets.

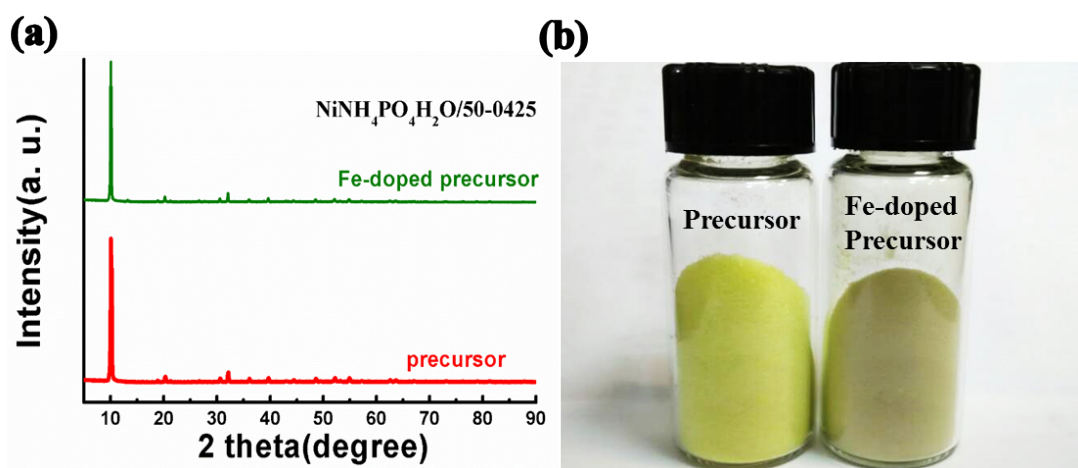

**Figure S3.** Comparison of  $\text{NiNH}_4\text{PO}_4\cdot\text{H}_2\text{O}$  and Fe-doped  $\text{NiNH}_4\text{PO}_4\cdot\text{H}_2\text{O}$ . (a) XRD patterns and (b) Optical images of  $\text{NiNH}_4\text{PO}_4\cdot\text{H}_2\text{O}$  nanosheets before and after doping with Fe.

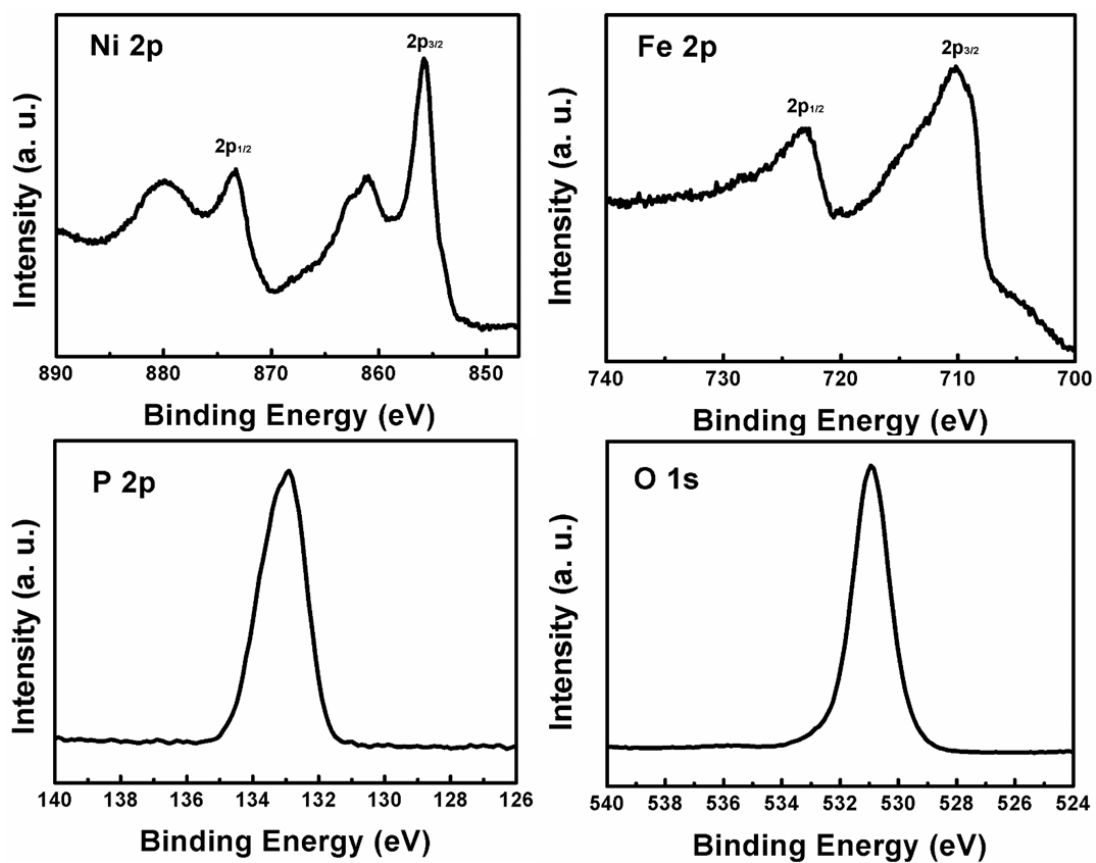

**Figure S4.** XPS spectra of (a) Ni 2p, (b) Fe 2p, (c) P 2p and (d) O 1s of the hierarchical Fe-doped LiNiPO<sub>4</sub> nanomesh.

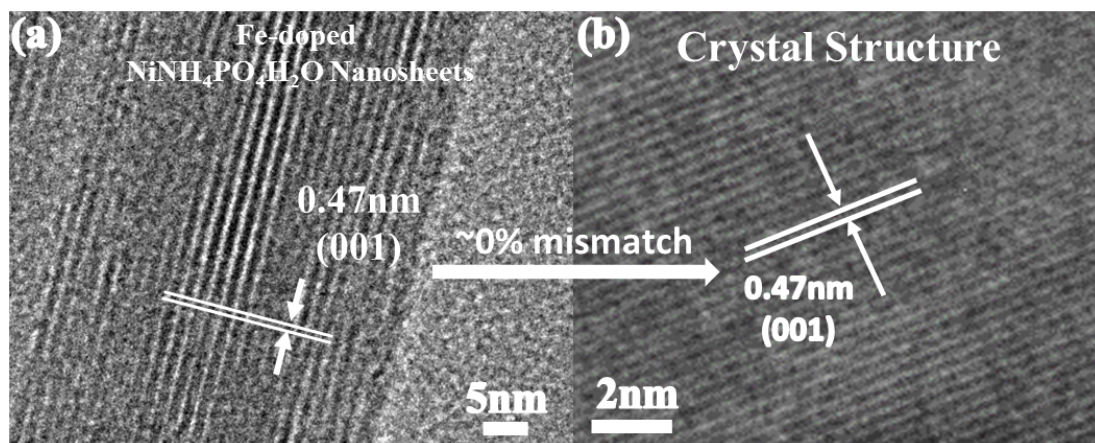

**Figure S5.** The schematics to introduce the mechanism through Fe-doped  $\text{NiNH}_4\text{PO}_4 \cdot \text{H}_2\text{O}$  nanosheet to Fe-doped  $\text{LiNiPO}_4$  nanomesh while maintaining the single crystal feature. From the calculation based on the (001) crystal plane of the precursor and the final samples, the crystal mismatch is close to 0%.

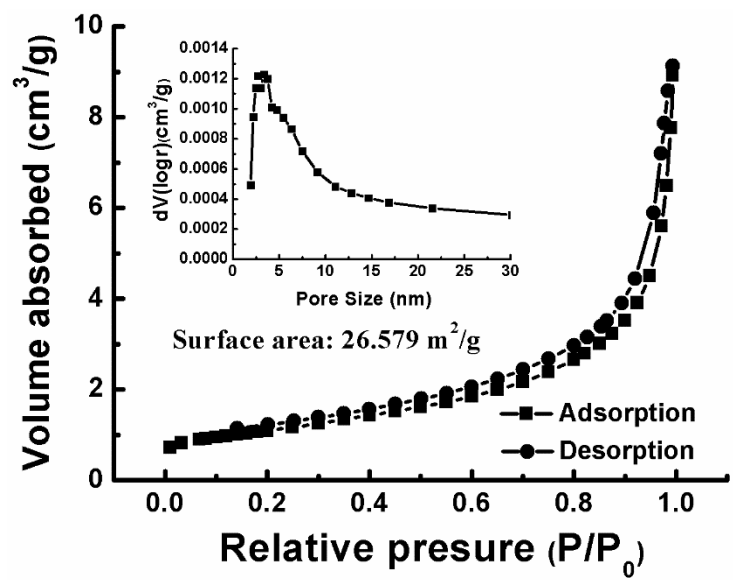

**Figure S6.** BET profile of the hierarchical LiNiPO<sub>4</sub> nanomesh.

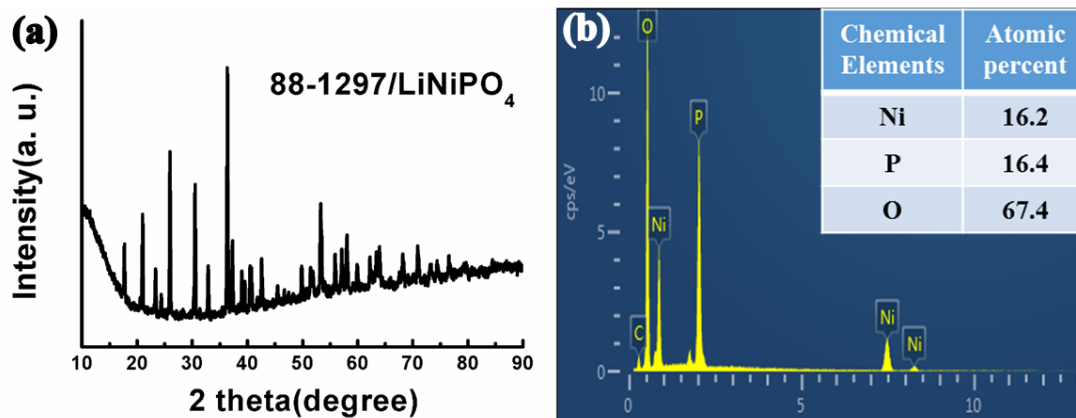

**Figure S7.** (a) XRD pattern of pure LiNiPO<sub>4</sub> nanomesh. (b) The corresponding EDS analysis.

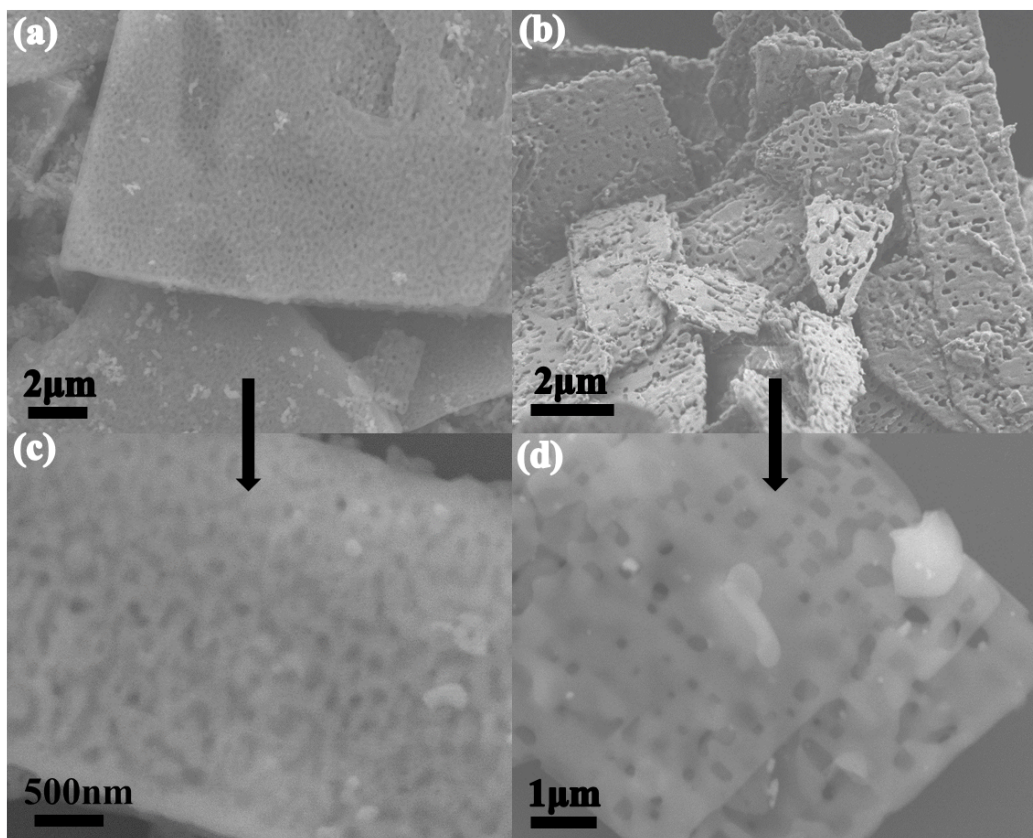

**Figure S8.** SEM images at different resolutions of Fe-doped LiNiPO<sub>4</sub> (a), (c) and LiNiPO<sub>4</sub> nanomesh (b), (d) for comparison.



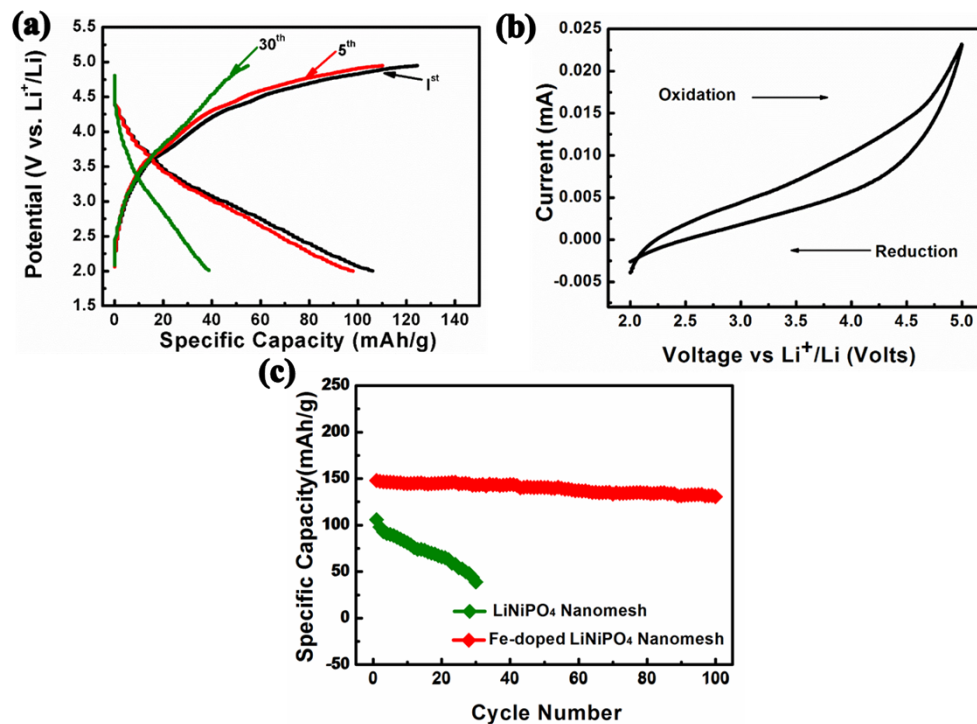

**Figure S9.** (a) The galvanostatic charge-discharge profiles of pure LiNiPO<sub>4</sub> nanomesh over 30 cycles at the rate of 0.1C. (b) CV profile of pure LiNiPO<sub>4</sub> nanomesh for 2.0-4.95 V. (c) Comparison of galvanostatic measurement of Fe-doped LiNiPO<sub>4</sub> and LiNiPO<sub>4</sub> nanomesh.

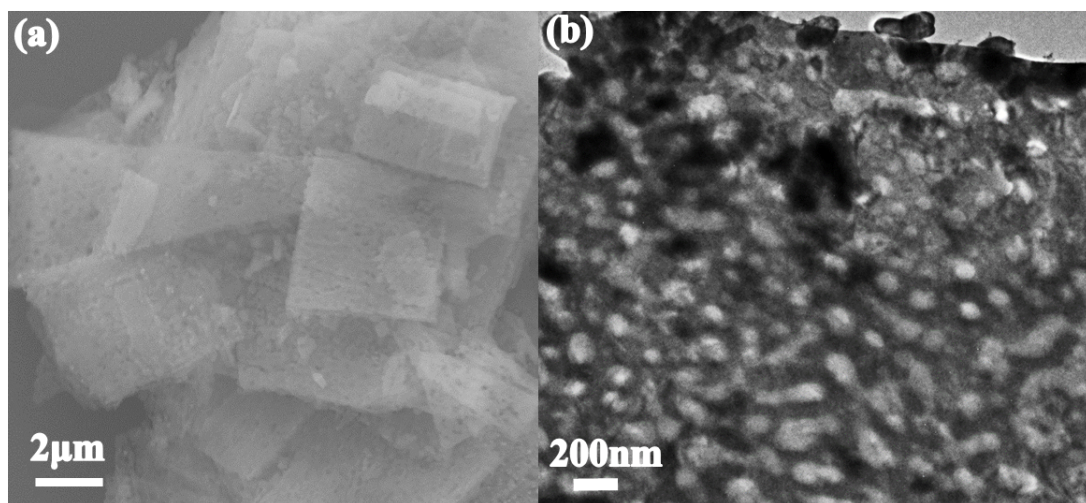

**Figure S10.** (a) SEM and (b) TEM images to clarify the well-maintained nanomesh structure after 100 cycles of galvanostatic charge-discharge.

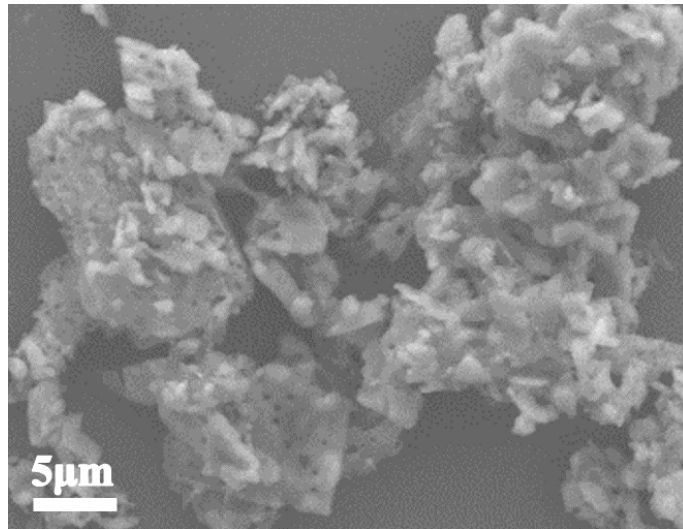

**Figure S11.** SEM image of LiNiPO<sub>4</sub> nanomesh after 30 cycles of galvanostatic charge-discharge.

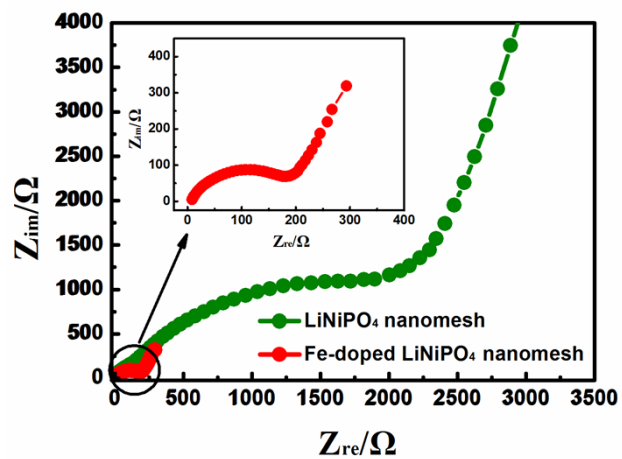

**Figure S12.** Comparison of AC impedance of Fe-doped  $\text{LiNiPO}_4$  nanomesh (red dot line) and  $\text{LiNiPO}_4$  nanomesh (green dot line) from 0.01Hz to 100 kHz.

| <b>Composite</b>                   | <b>Conductivity / S·cm<sup>-1</sup> (298K)</b> |
|------------------------------------|------------------------------------------------|
| <b>LiNiPO<sub>4</sub></b>          | 3.24*10 <sup>-8</sup>                          |
| <b>Fe-doped LiNiPO<sub>4</sub></b> | 5.02*10 <sup>-7</sup>                          |

**Table S1.** Conductivity of both LiNiPO<sub>4</sub> and Fe-doped LiNiPO<sub>4</sub> for comparison.
